# 1 SEPTINS COORDINATE WITH MICROTUBULES AND 2 ACTIN TO INITIATE CELL MORPHOGENESIS

3 Diana Bogorodskaya<sup>1,2</sup> and Lee A. Ligon<sup>1,2,\*</sup>

4 <sup>1</sup>Department of Biological Sciences, <sup>2</sup>Center for Biotechnology and Interdisciplinary  
5 Studies, Rensselaer Polytechnic Institute, Rensselaer Polytechnic Institute, Troy, NY,  
6 USA

7 \*Corresponding author  
8 E-mail: [ligonl@rpi.edu](mailto:ligonl@rpi.edu) (LL)

## 9 **Abstract**

10 Many organs are formed by a process of branching morphogenesis, which begins with the  
11 formation of cytoplasmic extensions from the basal surface of polarized cells in an  
12 epithelial sheet. To study this process, we used a system of polarized epithelial spheroids,  
13 which emit cytoplasmic extensions in response to treatment with hepatocyte growth  
14 factor. We found that these extensions contain both actin and microtubules, but also  
15 septins, which are localized to microtubule bundles and appear to be important in  
16 maintaining microtubule organization. We found that these extensions are highly  
17 dynamic and form at a non-linear rate. We also demonstrated that the coordinated activity  
18 of microtubules, actin, and septins is necessary for the formation and dynamic behavior  
19 of extensions. Each cytoskeletal system plays a distinct role in this process, with  
20 microtubules enabling persistent growth of the extensions, actin enabling extension  
21 dynamics, and septins organizing microtubules in the extensions and supporting the  
22 extension formation. Together, our data offer insights into the dynamics of early

23 morphogenic extensions and the distinct, but coordinated, roles of cytoskeleton in early  
24 morphogenesis.

## 25 **Introduction**

26 Cells undergo dramatic changes in shape and structure as part of tissue and organ  
27 development, but the molecular mechanisms underlying these morphogenic events  
28 remain poorly understood. One common signaling pathway involved in many types of  
29 cellular morphogenesis is that initiated by hepatocyte growth factor (HGF). HGF is a  
30 multifunctional cytokine growth factor implicated in a wide variety of cellular processes,  
31 including morphogenesis, motility, proliferation, and resistance to apoptosis (Bando et  
32 al., 2011; Xiao et al., 2001, Rosário and Birchmeier, 2003 ; Steffan et al., 2011; Tokunou  
33 et al., 2001). The primary receptor for HGF is the c-Met receptor tyrosine kinase, which  
34 initiates multiple downstream signaling pathways, although Met-independent pathways  
35 have been reported as well (Devarajan, 2004). The HGF/c-Met pathway is essential to  
36 development, and knockouts are embryonic lethal. This pathway is essential in the  
37 development of organs such as placenta, kidney, lung, mammary gland and liver, and is  
38 critical for growth, regeneration, and maintenance of homeostasis in multiple organs as  
39 well (Morimoto et al., 2017; Nakamura, Sakai, Nakamura, & Matsumoto, 2011; Rosário  
40 & Birchmeier, 2003; Tokunou et al., 2001). HGF/c-Met-mediated cell motility,  
41 reorganization of the extracellular matrix (ECM), and resistance to apoptosis have also  
42 been implicated in multiple types of cancer, in which inappropriate activation of the c-  
43 MET pathway leads to aberrant cell proliferation and metastatic invasion (Nakamura et  
44 al., 2011; Scagliotti, Novello, & von Pawel, 2013).

45 HGF has been utilized *in vivo* to stimulate morphogenesis in a model of branching  
46 morphogenesis, a developmental pattern that leads to the formation of epithelial tubes,  
47 which are integral parts of organs such as lungs and kidney (Kim & Nelson, 2012).  
48 Several model systems have been used to dissect this process (Rosário & Birchmeier,  
49 2003). One of the most well established models of *in vitro* tubulation involves three-  
50 dimensional cultures of Madin-Darby canine kidney (MDCK) cells. In this model,  
51 MDCK cells are seeded in a soft 3D substrate, such as collagen I, where over time they  
52 develop into a spheroid of polarized cells with the apical domains facing the lumen and  
53 the basal domains facing the ECM. In response to stimulation with HGF, some cells in  
54 the spheroids undergo a series of transformations that ultimately lead to tube formation.  
55 Individual cells undergo partial epithelial-mesenchymal transitions (pEMT) and emit  
56 extensions from the basal surface, which then elongate and undergo cell divisions to form  
57 a chain of cells. These chains continue to grow and reorganize to form cords and  
58 eventually tubes (O'Brien et al., 2004; Pollack, Runyan, & Mostov, 1998). This model  
59 has been widely used to study the process of morphogenesis and tissue regeneration, as  
60 well as more broadly, other processes involving epithelial-mesenchymal transitions (Yu  
61 et al., 2008).

62 Tubular morphogenesis requires coordinated changes in cell shape and invasion into the  
63 3D ECM. At the cellular level this involves integrated reorganization of the  
64 cytoskeleton. In addition, considerable force is necessary to extend cellular protrusions  
65 into the matrix (Bordeleau, Alcoser, & Reinhart-King, 2014). Studies on downstream  
66 effectors of HGF signaling, such as ERK kinase and MMPs, have demonstrated that  
67 changes in polarity and ECM degradation are involved as well (O'Brien et al., 2004).

68 Previous studies have shown that both the actin and microtubule cytoskeletons are  
69 necessary for this process (Gierke & Wittmann, 2012; Zhang & Vande Woude, 2003).  
70 Drugs that disrupt the actin cytoskeleton inhibit extension formation, and expression of  
71 dominant negative Rac1 or Cdc42 prevents the formation of tubes. RhoA, on the other  
72 hand, via the ROCK pathway, appears to play a role in resisting extension formation,  
73 perhaps through increasing cortical contractility (Yu et al., 2003). An early study  
74 suggested that dynamic microtubules are not required for the formation of extensions but  
75 are necessary for the transition to chains, as this process involves cell division (Yu et al.,  
76 2003). However, a more recent study showed that HGF stimulation leads to an increase in  
77 microtubule growth rates, in particular toward the basal surface of the cell and into the  
78 newly forming cytoplasmic extensions, where they often interacted with the tip and  
79 deformed the membrane. Knockdown of the +TIP protein EB1 led to a decrease in  
80 extension growth and an increase in malformed extensions with disorganized  
81 microtubules. In addition, EB1 knockdown led to defects in vesicle transport and  
82 decreased focal adhesion formation with a reduced pull on the collagen network,  
83 suggesting that the correct organization of microtubules is necessary for maintaining  
84 mechanical resistance to intracellular contractile forces and allowing for successful  
85 growth in the 3D environment (Gierke & Wittmann, 2012). Despite these studies,  
86 questions remain about the molecular mechanisms of this initial stage of morphogenesis:  
87 the formation of cytoplasmic extensions from the basal surface. Here we specifically  
88 looked at the role of microtubule bundles in extension formation and growth.

89 In addition to their roles in providing tracks for intracellular transport, and establishing  
90 and maintaining subcellular organization, microtubules provide structural integrity to



91 cells and can serve as struts to support complex structures and resist or counteract actin-  
92 based compressive forces (Ingber, Wang, & Stamenović, 2014). Although individual  
93 microtubules do not have significant mechanical strength, microtubule bundles can be  
94 very strong and have the ability to resist substantial forces within the cell (Forth &  
95 Kapoor, 2017). Many proteins interact with microtubules and can potentially crosslink or  
96 bundle them. Septins, a family of GTPases that form filaments and higher order  
97 structures in the cell, have been shown to interact both directly (Bai et al., 2013) and  
98 indirectly (Bowen, Hwang, Bai, Roy, & Spiliotis, 2011; Surka, Tsang, & Trimble, 2002)  
99 with microtubules. In addition, they preferentially localize to microtubule bundles, both  
100 naturally occurring and Taxol-induced (Dolat et al., 2014; Nagata et al., 2003; Surka et  
101 al., 2002). Septins have also been shown to modulate microtubule dynamics, both  
102 through direct microtubule interaction (Bai et al., 2013) and through association with  
103 other microtubule associated proteins (MAPs), such as HDAC6 (Ageta-Ishihara et al.,  
104 2013), MAP4, (Spiliotis, Hunt, Hu, Kinoshita, & Nelson, 2008; Surka et al., 2002) and  
105 polyglutamylases (Froidevaux-Klipfel et al., 2015).

106 To test whether septin-associated microtubule bundles are necessary for the formation  
107 and/or growth of cytoplasmic extensions, we developed a biomimetic 3D model to  
108 investigate the early steps of branching morphogenesis in a more physiologically relevant  
109 system. We adapted the earlier model by incorporating a step to jumpstart the formation  
110 of a basement membrane around the spheroids before embedding them in a collagen gel,  
111 to more accurately model the organization of epithelial tissue. In addition, we tuned our  
112 hydrogel conditions to mimic the mechanical properties of healthy tissue (McLane and  
113 Ligon, 2015a). MDCK spheroids grown in this system respond to HGF in a stereotypical

114 fashion similar to those in previous studies (Pollack et al., 1998). The first step of this  
115 cellular morphogenesis is the extension of cytoplasmic protrusions from the basal domain  
116 of single cells within an hour of HGF addition. Surprisingly, we found that these  
117 extensions are initially highly dynamic, often alternating between phases of growing and  
118 shrinking. These dynamics are dependent on both the actin and microtubule  
119 cytoskeletons, as are extension formation and overall growth. Microtubule bundles are  
120 prominent features of the extensions, and septins are localized to these bundles. Septin  
121 disruption blocks this co-localization and inhibits extension formation. Septin disruption  
122 at later stages of extension formation leads to malformed extensions with unbundled and  
123 disorganized microtubules, and disruption at even later stages blocks the transition from  
124 single cell extensions to chains. Together these data suggest that the early steps of  
125 cellular morphogenesis are highly dynamic and that both the microtubule and actin  
126 cytoskeleton are necessary for this process. In addition, they suggest that septin-mediated  
127 microtubule bundles are a key element in the formation and maintenance of these  
128 cytoplasmic extensions.

## 129 **Results**

### 130 **HGF leads to cytoplasmic protrusions, which contain both actin and microtubules**

131 To elucidate the mechanisms underlying epithelial morphogenesis, we developed a  
132 physiologically relevant 3D hydrogel system in which spheroids of MDCK cells are first  
133 formed in suspension in media containing a low concentration (sub-gelation) of  
134 Matrigel<sup>®</sup>, which allows extracellular matrix (ECM) components to adsorb to the  
135 spheroid surface and jumpstart the formation of the basement membrane. These spheroids

136 with their nascent basement membranes are then embedded in a collagen-I gel of  
137 physiological stiffness, which allows the cells to efficiently develop into polarized  
138 epithelial spheroids with an intact basement membrane (McLane and Ligon, 2016). When  
139 these spheroids are treated with Hepatocyte Growth Factor (HGF), they respond in a  
140 stereotypical fashion, similar to that previously reported, by extending protrusions from  
141 the basal surface of single cells, which then elongate and undergo cell division to form  
142 chains, which will then eventually develop into tubes (Figure 1A, B). Here we focused on  
143 the initial cytoplasmic extensions that emerge from the basal membranes of individual  
144 cells. We observed considerable morphological diversity in these extensions, with some  
145 being broad at the base (encompassing the entire basal surface of the cell) and others  
146 having more narrow bases. Many tapered from the base to the tip of the extension, while  
147 others had a more consistent diameter from base to tip. Mean width at the midpoint  
148 between extension tip and base was  $6.54 \pm 1.99 \mu\text{m}$  (measured in a representative  
149 population of extensions ( $n=23$ ) after a 24 hr incubation in HGF), but the length was  
150 more variable (discussed below). Despite this morphological variation, all extensions  
151 displayed robust actin and microtubule networks (Figure 1C), similar to previous reports  
152 (Gierke & Wittmann, 2012; Pollack et al., 1998). The microtubule network appeared  
153 especially well-organized in the narrower, less tapered, extensions in which bundled  
154 microtubules predominate (arrowheads in Figure 1C). Both microtubules and actin  
155 filaments were localized to the initial extensions formed after only one hour of HGF  
156 treatment, and both also persist in longer-lived extensions ( $\geq 18$  hours HGF treatment) as  
157 well (Figure 1C).

#### 158 **HGF-induced cytoplasmic extensions are dynamic**

159 To better understand extension growth and characterize its parameters, we used timelapse  
160 imaging of spheroids embedded in collagen gels. We imaged live spheroids using DIC  
161 microscopy. The polarized cells in the spheroids in this system begin to respond to HGF  
162 by extending cytoplasmic protrusions as early as one hour after the addition of HGF  
163 (Figure 1C), but we could not reliably detect them with DIC until ~4 hours, so we began  
164 our recordings after 4 hours of HGF incubation and recorded for 15 hours. The rate of  
165 extension formation appears to be non-linear, with few extensions forming during the  
166 initial phase, and a significant increase in extension formation during later phases (Figure  
167 2A, B, Supplementary video 1). The rate of extension formation was modest for the first  
168 11 hours (phase 1), averaging approximately two visible extensions per spheroid that  
169 grow to ~20  $\mu\text{m}$  in length (although this is likely an underestimate of the total number of  
170 extensions as we will not see the extensions growing up or down in the Z-dimension).  
171 After 12-15 hours of HGF exposure, extension formation is more robust, resulting in both  
172 more extensions per spheroid and longer extensions (phase 2). This trend is accelerated  
173 after 16-19 hours of HGF exposure, resulting in even more and longer extensions in  
174 phase 3 (Figure 2B, C). In order to exclude the possibility that the higher number of  
175 extensions observed in later phases are the result of the accumulation of extensions  
176 formed earlier, we also measured extension lifetimes. We found that extensions formed in  
177 phases 1 and 2 had an average lifetime of approximately 3 hours, and this did not differ  
178 between phases 1 and 2 (Figure 2D). We could not determine the lifetimes of those  
179 extensions formed in phase 3, because our recordings ended after 19 hours. These data  
180 suggest two things: first, that the increase in the number of extensions in phases 2 and 3 is  
181 not due to the accumulation of extensions formed over the earlier phases. Secondly, they

182 suggest that the extensions are dynamic, with relatively short lifetimes, at least during the  
183 first two phases.

184 To quantify extension dynamics, we scored each extension visible during each recording  
185 window (corresponding to phases 1, 2, and 3) and determined whether it showed  
186 persistent growth, persistent shrinkage, no change, or alternated between growth and  
187 shrinkage. In all three phases, extensions were highly dynamic. In phase 1, ~70% of  
188 extensions switched between growing and shrinking, while smaller percentages showed  
189 persistent growth or shrinkage. None of the extensions observed in phase 1 were stable  
190 with no growth or shrinkage. The extensions seen in phase 2 were similar, although a  
191 significantly higher percentage showed persistent growth than in phase 1 ( $p = 0.037$ ). By  
192 phase 3, the proportion of extensions showing persistent growth was larger still, although  
193 the proportion showing persistent shrinkage was also larger than in phase 2, resulting in a  
194 decrease in those showing both growth and shrinkage (Figure 2E).

### 195 **Extension formation and dynamics depend on both actin and microtubules**

196 Previous studies have suggested that both actin filaments and microtubules are necessary  
197 for extension formation (Gierke & Wittmann, 2012; Pollack et al., 1998). Here we sought  
198 to determine whether an intact actin network and/or microtubule network is necessary to  
199 support the extension dynamics we observed. We incubated spheroids in HGF for 18  
200 hours to allow for robust extension formation, and then added either an actin inhibitor  
201 (Latrunculin B) or a microtubule depolymerizing drug (Nocodazole) for two hours  
202 (Figure 3, Supplementary Videos 2-4). Both drugs resulted in a substantial disruption of

203 the respective cytoskeletal network in extensions without obvious disruption of the other  
204 network (Figure 3A).

205 We then imaged the spheroids as described previously (Figure 2), beginning  
206 approximately 20 minutes after the addition of drugs. Latrunculin treatment resulted in a  
207 dramatic increase in non-dynamic extensions, with 93% stalled. The remaining 7%  
208 showed shrinking and none grew. The extensions also showed a widening of the  
209 extension body and membrane blebbing (Figure 3B). Nocodazole treatment, on the other  
210 hand, led to a large increase in shrinking extensions and a five-fold decrease in growing  
211 extensions (Figure 3) and many showed a collapsed morphology (Figure 3B). We also  
212 tested whether new extension formation depended upon intact cytoskeletal networks by  
213 scoring de novo extension formation during the drug incubations. We found that  
214 Latrunculin treatment completely eliminated new extension formation, and Nocodazole  
215 treatment led to a 38% decrease in extension formation as well. Together these data  
216 suggest that both actin and microtubule networks are necessary for extension formation  
217 and dynamic behavior. The actin cytoskeleton appears to play a key role in initiating new  
218 extensions, but microtubules appear to be necessary for extension elongation and play an  
219 important role in extension initiation as well.

### 220 **Septins localize to microtubule bundles in extensions and are necessary for** 221 **extension formation and growth**

222 As our data suggested that microtubules are important in both extension initiation and  
223 extension growth and dynamics, and because microtubule bundles are prominent features  
224 in extensions, we sought to better understand the mechanisms underlying this

225 microtubule organization by looking at potential crosslinkers. We focused on septins, a  
226 large family of filamentous GTPases that have been shown to associate with microtubules  
227 and may play a role in microtubule bundle formation (Bai et al., 2013; Bowen et al.,  
228 2011; Nagata et al., 2003; Surka et al., 2002). We first performed immunocytochemistry  
229 to determine if septins are localized to extensions. We used a cocktail of antibodies to  
230 septins 2 and 9, two ubiquitous subunits, and found that septins were robustly localized to  
231 cytoplasmic extensions in both the early phase of extension formation and in the later  
232 phases as well (Figure 4A). Furthermore, we found that septins co-localized with  
233 microtubules throughout the extensions, although the overlap was most prominent at the  
234 base, but did not significantly co-localize with actin filaments in the extensions (Figure  
235 4A). Next, we tested whether disruption of the septin network would interfere with  
236 microtubule co-localization by using Forchlorfenuron (FCF), a drug that has been shown  
237 to inhibit septin subunit exchange and thus disrupt the dynamic network (Spiliotis et al.,  
238 2008). We added FCF for 4 hours to spheroids that had already been incubated with HGF  
239 for 20 hours and found a significant decrease in septin/microtubule co-localization  
240 (Figure 4A). Finally, if we added FCF to the spheroids at the same time as adding HGF,  
241 we saw a dramatic reduction in the number of extensions at 24 hours, suggesting that  
242 septins play an important role in extension initiation (Figure 4B).

243 To further investigate the interaction between microtubules and septins in extensions, we  
244 examined the connection between septins and microtubule bundles. We found that in  
245 cells grown in 2D, septins localized to microtubule bundles, whether induced by taxol  
246 (Figure S1) or by HGF incubation (Figure 5A). We also found that when we added FCF  
247 to 3D spheroids that had been pre-incubated with HGF for 16 hours to allow extensions

248 to form (spheroids were incubated in HGF + FCF for an additional 8 hours), resulting  
249 extensions were very disorganized in comparison to control extensions, and were often  
250 bulbous or branched (Figure 5B). The microtubules in the FCF treated extensions were  
251 often unbundled, and splayed, curly or wavy (Figure 5B), whereas in control extensions,  
252 microtubules were typically found in straight bundles.

253 We then used siRNA-mediated knockdown of septin 2 in spheroids to further confirm the  
254 role of septins in extension organization. We chose to knock down septin 2, because  
255 members of the septin 2 family are thought to be critical to the formation of many of the  
256 septin complexes (Sellin, Sandblad, Stenmark, & Gullberg, 2011). Spheroids were  
257 transfected with septin 2 siRNA duplexes or control constructs, placed in gels for 48  
258 hours, and then stimulated with HGF for 24 hours. Whereas the extensions in control  
259 spheroids were typically long, thin, and straight, with robust, septin-decorated  
260 microtubule bundles, the extensions in KD spheroids showed a significant decrease in the  
261 localization of septins to microtubules. In addition, the microtubules in KD extensions  
262 were curled and wavy, and the overall shape of the extensions was rounded or irregular  
263 (Figure 5C). Together, these data suggest that septins are necessary to maintain the  
264 bundled organization of microtubules in extensions, which may be necessary for  
265 extension formation and growth.

### 266 **Septins are necessary for the progression of morphogenesis**

267 To mature into cell chains and eventually tubes (see Figure 1), extensions must first  
268 become stabilized and make productive interactions with the extracellular matrix (Gierke  
269 & Wittmann, 2012) and then the cells need to undergo cell division (Yu et al., 2003).



270 Septins are essential to cell division (Mostowy & Cossart, 2012), so we tested whether  
271 septins were necessary for the transition from extension to chain. We incubated spheroids  
272 in HGF for 18 hours, and then added FCF for an additional 12 hours. In our system, by  
273 30 hours of HGF exposure, many of the extensions have begun the transition to chains.  
274 We found that septin disruption during this phase of morphogenesis significantly  
275 inhibited the transition from extension to chain (Figure 6). Whereas control spheroids  
276 showed a robust population of single-cell extensions and one or more chains per  
277 spheroid, septin disruption led to a twofold decrease in average extension length (Figure  
278 6A, B), a twofold decrease in the number of extensions per  $\mu\text{m}$  of spheroid  
279 circumference (Figure 6C), and a near abolishment of chain formation (Figure 6D). To  
280 confirm that the decrease in the number of chains is not due to the overall decrease in the  
281 number of extensions, we also calculated the ratio of chains to extensions and found that  
282 it was significantly decreased as well (Figure 6E). Together, these data suggest that  
283 septins are necessary for the maturation of extensions, either through structural  
284 stabilization or through cell division or both.

## 285 **Discussion**

286 Here we have used a biomimetic 3D culture of spheroids of polarized epithelial cells to  
287 elucidate the molecular mechanisms underlying cellular morphogenesis in response to  
288 HGF. We have focused on the earliest step of morphogenesis – the extension of  
289 cytoplasmic protrusions from the basal surface. We have found that these extensions are  
290 surprisingly dynamic, often alternating between bouts of growth and retraction.  
291 Consistent with previous studies, we found that both the microtubule and actin networks  
292 are necessary for extension formation and growth, but we also found that they are

293 necessary for extension dynamics as well. In addition, we found that septin-mediated  
294 microtubule bundles are a key element in the formation and maintenance of these  
295 cytoplasmic extensions.

296 Intriguingly, we found that the rate of extension formation was not constant. In the first  
297 12 hours after HGF addition, we typically observed only 1-2 extensions per spheroid.  
298 These early extensions are very dynamic, with average lifetimes of approximately three  
299 hours. The rate of extension formation increased after 12-15 hours of HGF stimulation so  
300 that there were approximately 3-4 extensions per spheroid, but these extensions were also  
301 dynamic and relatively short-lived. However, the rate of extension formation increased  
302 sharply after 15 hours of HGF exposure, and more of the extensions appeared to be  
303 persistently growing. We were not able to determine the lifetime of these extensions, but  
304 a substantial number of them continue to grow and develop into cords and eventually  
305 tubes. It is not clear what lies behind this stepwise increase in extension formation. It is  
306 possible that the accumulation of a signal, protein or post-translational modification may  
307 be necessary. New gene expression may be necessary as well. It is also possible that the  
308 acceleration of extension formation we observed might be caused by intercellular  
309 signaling rather than intracellular signaling. We noted that there appeared to be a degree  
310 of coordination between the cells of a spheroid. For example, within the same gel, some  
311 spheroids had few or no extensions, some had an average number, and some had an  
312 extremely high number (data not shown). The uniform composition of the gel and the  
313 distribution of the spheroids within the gel makes it unlikely that unequal growth factor  
314 exposure is the differentiating feature. However, it is possible that when a critical number  
315 of cells in a spheroid begin morphogenesis, other cells in the spheroid are triggered to

316 undergo pEMT as well. Further investigation is needed into how the cells in a spheroid  
317 communicate with each other and if undergoing pEMT results in an intercellular  
318 feedback loop.

319 The degree of dynamicity we observed in the early extensions was also somewhat  
320 unexpected. In the early phases of morphogenesis, no extensions were static and few  
321 even showed persistent growth. Rather, most underwent periods of growth and  
322 retractions. This behavior is strikingly similar to that seen in neurogenesis, in which  
323 immature neuronal processes extend from the cell body and undergo periods of growth  
324 and retraction before one reaches a critical length and becomes the axon (Dotti, Sullivan,  
325 & Banker, 1988), suggesting that the molecular mechanisms underlying these two  
326 different types of cellular morphogenesis may be similar. Although the precise purpose of  
327 the dynamic behavior we observed in this system is unknown, it has been shown that in  
328 order to grow and stabilize, an extension must make productive adhesions to the ECM  
329 and in their absence, extensions retract (Fessenden et al., 2018; Gierke & Wittmann,  
330 2012). Dynamic growth and retraction of cytoplasmic extensions might be a way for cells  
331 to explore the extracellular space and find favorable topology and ligands for formation  
332 of a stable adhesion. We also frequently saw sequential extensions arising from the same  
333 cell that appeared to grow along the same path through the ECM (data not shown),  
334 suggesting that newly formed extensions follow the same topological cues as the  
335 preceding ones.

336 Not unexpectedly, we found that microtubules and actin filaments are necessary for the  
337 formation, growth and dynamics of the extensions. The disruption of the actin  
338 cytoskeleton appears to more profoundly inhibit extension initiation than does

339 microtubule depolymerization, probably due to its key role in remodeling the basolateral  
340 surface (Fessenden et al., 2018). However, we also observed robust recruitment of  
341 microtubules to extensions as early as we could detect them, suggesting that the  
342 cytoskeletal systems are highly temporary coordinated, and microtubules quickly grow  
343 into the nascent extensions. In addition, we saw that microtubule depolymerization did  
344 significantly inhibit extension initiation, suggesting that actin remodeling is not sufficient  
345 for extension formation. A similar pattern of microtubules populating axon-rich filopodia  
346 has been observed in neurite formation as well (Pacheco & Gallo, 2016).

347 Extension growth also depends on both cytoskeletal systems. Disruption of actin  
348 inhibited all dynamic activity, while depolymerization of microtubules specifically  
349 blocked persistent elongation. It is possible that actin supports all changes in extension  
350 shape, whereas microtubules, in particular microtubule bundles, provide structural  
351 support for extensions, stabilizing the shaft and enabling elongation. The precise  
352 mechanistic interaction of these two systems in this type of morphogenesis remains to be  
353 elucidated. A recent study has shown that in growing neurites, waves of actin move along  
354 the neurite shafts, transiently widening them to allow increased microtubule  
355 polymerization into the neurite, which then allows for enhanced vesicular transport to the  
356 tip to promote outgrowth (Winans, Collins, & Meyer, 2016). Perhaps a similar  
357 mechanism may play a role here.

358 Our initial observation of robust microtubule bundles in extensions led us to focus on  
359 microtubule crosslinkers, specifically septins. We found that septins colocalize with  
360 microtubule bundles, but not actin in the extensions, and the disruption of septins led to a  
361 decrease in colocalization. It has previously been shown that septins associate with

362 microtubule bundles (Bowen et al., 2011; Estey, Di Ciano-Oliveira, Froese, Bejide, &  
363 Trimble, 2010; Martínez et al., 2006; Sellin, Holmfeldt, Stenmark, & Gullberg, 2011) but  
364 it remains unclear whether septins promote the formation of de novo microtubule bundles  
365 or whether they actively bundle them. Disruption of the septin network led to microtubule  
366 disorganization in the extensions. Some microtubules became unbundled, and the  
367 unbundled microtubules were typically splayed, curled, or wavy. Additionally, some of  
368 the microtubule bundles that remained were disordered, curved or wavy. This disruption  
369 affected the general shape of the extensions, resulting in rounded or irregularly shaped  
370 extensions. These findings suggest that septins organize and maintain microtubule bundles  
371 in the extensions and support extension shape. In developing neurons, septin 9 has been  
372 shown to directly bind and bundle microtubules to promote dendrite outgrowth (Bai et  
373 al., 2013), and we propose a similar mechanism may play a role in tubulogenesis as well.

374 We found that the inhibition of septins abolished the formation of extensions, suggesting  
375 that they play an essential role in the morphogenic process. In addition to interacting with  
376 microtubules, septins have also been shown to interact with the actin cytoskeleton as well  
377 (Spiliotis, 2018). Although we did not observe extensive colocalization between septins  
378 and actin in the nascent extensions, it is possible that the essential role septins play may  
379 be in the remodeling of the actin cytoskeleton immediately preceding extension  
380 protrusion. A similar remodeling has been demonstrated in dorsal root ganglion neurite  
381 formation (Hu et al., 2012). On the other hand, the essential role that septins play may be  
382 due to interactions with microtubules. Septin-microtubule interactions are essential for  
383 the formation of microtubule-based protrusions that are induced by bacteria in the host  
384 cell to aid in pathogenesis (Nölke et al., 2016; Schwan & Aktories, 2016) and they have

385 also been shown to interact with the microtubule +TIP protein EB1 to regulate  
386 microtentacle (short thin microtubule-based protrusion) formation in cancer cells  
387 (Østevold et al., 2017). Interestingly, these bacterially-induced protrusions and  
388 microtentacles show a striking morphological similarity to the cytoplasmic extensions in  
389 our system, and all are richly filled with microtubules. Finally, it is possible that septins  
390 serve to coordinate the activities of the actin and microtubule networks. It has recently  
391 been demonstrated in cortical neurons that septin disruption results in the formation of  
392 actin-rich filopodia that exclude microtubules and are unable to transition to neurites  
393 (Boubakar et al., 2017). Although the architecture of the different types of cytoplasmic  
394 extensions discussed here may vary, all show septin localization to microtubules at the  
395 base (Nölke et al., 2016; Østevold et al., 2017; Xie et al., 2007). This interaction at the  
396 base of cytoplasmic protrusions might serve to redirect existing microtubules from the  
397 cell body into the protrusions, where EB1 and other microtubule-associated proteins may  
398 direct growth along other microtubules and allow bundles to form. Alternately, septins  
399 may directly crosslink microtubules in the forming extension to aid in bundle formation.  
400 In both cases, septins facilitate the formation of microtubule bundles, which provide  
401 increased mechanical stability for these protrusions. However, more work is needed to  
402 characterize the specific roles of septins and other microtubule associated proteins  
403 involved in this process. In addition, the septin family is large with different subunits  
404 forming different complexes and a better understanding of the family in these processes  
405 is necessary.

406 Finally, we have shown that septins are necessary for the maturation of extensions to  
407 multicellular chains. We have hypothesized that septins play a role in extension

408 stabilization by contributing to the formation of microtubule bundles and thereby the  
409 mechanical strength of the extension. It is possible that the failure in maturation is due to  
410 disruption of this stabilization, but it is also likely that septin disruption interferes with  
411 cell division. The transition from extension to chain requires cell division (Yu et al.,  
412 2003), and septins are known to play an essential role in cell division (Addi, Bai, &  
413 Echard, 2018), although there may be some cell-type differences (Menon et al., 2014).  
414 Further experimentation will be necessary to differentiate between these possibilities.

415 Our observations, combined with previous findings, lead to a more comprehensive model  
416 of the early stages of branching morphogenesis (Figure 7). Extension formation starts  
417 with a relaxation of the contractile cortical actin meshwork (Yu et al., 2003), followed by  
418 remodeling of the basal actin network (Fessenden et al., 2018). Microtubules, perhaps  
419 supported by septins, grow into the developing extensions, forming bundles that provide  
420 an extensive force, mechanical strength, and tracks for the delivery of cargoes necessary  
421 for growth (Gierke and Wittmann, 2012; our data). Nascent extensions are initially  
422 dynamic, showing phases of growth and retraction to probe the environment, and this  
423 dynamicity depends on both the actin and microtubule cytoskeleton (Figure 3). This  
424 dynamic phase is followed by stabilization, in which the extensions make a productive  
425 adhesion to the ECM, which allows for continued growth, and maturation into a chain  
426 (Fessenden et al., 2018; Gierke & Wittmann, 2012). This model suggests that the process  
427 of tubulogenesis shares a great deal of mechanistic detail with the process of  
428 neuritogenesis in developing neurons. However, further experimentation will be  
429 necessary to determine the extent of overlap in these molecular mechanisms.

## 430 **Methods**

### 431 **Cells and cell maintenance**

432 MDCK cells (product ATCC CCL34, American Type Culture Collection) were cultured  
433 according to product specifications in DMEM high glucose (Corning) supplemented with  
434 10% fetal bovine serum (TBA), 1% penicillin/streptomycin (Corning) at 37 °C, 5 %  
435 CO<sub>2</sub>. As cell line authentication is not readily available for canine cells, we confirmed  
436 that cells showed epithelial morphology at every step and only used cells from passages  
437 5-25.

### 438 **Morphogenesis induction**

439 Morphogenesis was induced by the addition of recombinant human HGF (product  
440 H1404, Sigma-Aldrich) and conditioned media from NIH/3T3 cells (product CRL-1658,  
441 ATCC). A stock solution of 3.5 µg/mL HGF in MilliQ-water was prepared and stored in  
442 50 µL aliquots at -20°C. Aliquots were thawed on ice before use. NIH/3T3 conditioned  
443 media (CM) was prepared by growing 3T3 cells in T-75 flasks (Corning) to 70%  
444 confluence (for approximately 3 days), then collecting the culture media (3T3 cells were  
445 grown in the same media formulation as MDCK cells) and filtering it with a 0.2 µm  
446 filter. To induce morphogenesis, cells were incubated in a mixture of 25% 3T3 CM and  
447 75% fresh MDCK media, with HGF added to a final concentration of 35ng/mL.

### 448 **Preparation of spheroids and hydrogels**

449 Basement membrane coated spheroids of polarized epithelial cells were formed similarly  
450 to those previously described (McLane, Rivet, Gilbert, & Ligon, 2014). Briefly, 250,000  
451 cells in 1mL of culture media were mixed with 500 µL of Matrigel® (Corning) at



452 3mg/mL in Opti-MEM (Corning), resulting in a final concentration of 1mg/mL  
453 Matrigel®, which is below the concentration necessary for gelation. The mixture was  
454 placed in a 15mL conical tube (Corning) which was then incubated at 37 °C, 5 % CO<sub>2</sub>.  
455 The tubes were arranged horizontally with the lids loosely affixed to allow for air  
456 exchange. After an overnight incubation, cells were transferred to a 35mm tissue culture  
457 dish (VWR) with 1mL of culture media added. The cells were allowed to form  
458 aggregates, which then progressed to spheroids with polarized cells over 4 to 5 days. An  
459 additional 1mL of culture media was added on day 2 to supplement nutrients.  
460 Spheroids were then embedded in a collagen-I hydrogel. To prepare the hydrogels, we  
461 adapted a method used previously (McLane & Ligon, 2015). Briefly, calf skin derived  
462 collagen I (MP Biomedicals) was mixed with neutralizing solution (0.52 M sodium  
463 bicarbonate, 0.4 M HEPES, and 0.08 N sodium hydroxide) and culture media, at the ratio  
464 of 615: 77: 308 (collagen I: neutralizing solution: media). 50 µL of the collagen-I mixture  
465 was pipetted into the bottom of the wells of an 8-chamber slides (VWR) to coat the  
466 surface and allowed to gel for 20 minutes at 37°C. A second collagen-I mixture was  
467 prepared in which the culture media was replaced with the spheroid preparation from the  
468 previous step, and 50 µL of this mixture was pipetted into the wells of the 8- chamber  
469 slide on top of the previous mixture and allowed to gel for an additional 20 minutes at  
470 37°C. After gelation, 300 µL of culture media was pipetted into each well and the cells  
471 were maintained at 37 °C, 5 % CO<sub>2</sub> for up to 3 days. For some experiments, 35mm glass-  
472 bottom dishes (MatTek) were used instead of 8-chamber slides to facilitate live imaging.  
473 In this case, the volumes of the first and the second collagen-I layers were adjusted to 300  
474 µL, and the total media volume was 2mL. For some preliminary experiments, cell

475 aggregates were seeded in collagen I gels immediately after the overnight Matrigel®  
476 incubation step. Separate 100 µL drops of the spheroid/collagen-I mixture were placed in  
477 a 100mm dish and allowed to solidify for 45 minutes before 10mL of culture media was  
478 added to the dish. The cells were maintained at 37 °C, 5 % CO<sub>2</sub>, for 6 – 9 days, and  
479 polarized spheroids developed in 6-7 days.

#### 480 **Microscopy and imaging**

481 Unless otherwise noted, imaging was done on an inverted microscope (DMI 4000B  
482 Inverted Microscope, LEICA Microsystems) outfitted with an ORCA-ER digital camera  
483 (Hamamatsu Photonics) and a Yokogawa spinning disc confocal using Volocity imaging  
484 software (Improvision/PerkinElmer). Super resolution microscopy images were taken  
485 with an Eclipse Ti2-E microscope equipped with Nikon N-STORM 5.0 system (Nikon)  
486 using NIS-Elements software (Nikon).

487 Fixed cells in hydrogels (see below) were prepared for imaging by placing a gel in 35mm  
488 glass-bottom dish (MatTek), removing excess PBS with a Kimwipe (Kimtech Science),  
489 applying a drop of SlowFade® Diamond antifade mountant (ThermoFisher Scientific),  
490 allowing the gel to incorporate the antifade reagent for approximately 1 minute and then  
491 placing a glass coverslip on top to flatten the gel, optionally adding a 1g precision weight  
492 (Nasco) on top to further flatten the gel.

493 Live imaging was done on a VivaView F1 incubator microscope with DIC optics  
494 (Olympus) using MetaMorph Software (Molecular Devices). Samples were kept at 37 °C,  
495 5% CO<sub>2</sub> and images were acquired every 10 minutes for the duration of the experiment.  
496 Low-magnification bright field images of spheroids were also acquired using a tissue

497 culture inverted microscope (DM IL, LEICA Microsystems), with a universal smartphone  
498 adapter (Modern Photonics) and an iPhone 7 camera.

#### 499 **Immunocytochemistry**

500 Spheroids in gels were fixed with 4% paraformaldehyde in PBS for 45 min at 37°C, then  
501 permeabilized with 0.25% Triton-X in dH<sub>2</sub>O for 45 min at room temperature, washed  
502 briefly with PBS + 0.05% sodium azide (PBS- NaN<sub>3</sub>), and blocked for 2 hr at room  
503 temperature or overnight at 4°C in blocking solution (5% goat serum, 1% BSA, 0.05%  
504 NaN<sub>3</sub> in PBS). Spheroids were then incubated with primary antibodies diluted in PBS +  
505 0.05% sodium azide overnight at 4°C. The antibodies used were: alpha tubulin @1:500,  
506 Sigma-Aldrich product T9026; septin 2 @1:100 Proteintech product 22397-I-AP; septin  
507 9 @1:100, Proteintech, product 10769-I-AP; ZO-1 @1:400, Life Technologies, product  
508 33910. Antibody incubation was followed by three PBS-NaN<sub>3</sub> washes, 60 minutes each.  
509 Samples were then incubated overnight with secondary antibodies (@ 1:300, Alexa  
510 Fluor, Jackson labs), and/or rhodamine phalloidin for f-actin (product P1951, Sigma-  
511 Aldrich) and counterstained with DAPI (4',6-diamidino-2-phenylindole), followed by  
512 three 60 min washes with PBS-NaN<sub>3</sub>. Fixed hydrogels with spheroids were stored in  
513 1.5mL conical tubes in PBS-NaN<sub>3</sub>.

514 Cells grown on glass coverslips (2D) were fixed with 4% paraformaldehyde in PBS for  
515 10 min at 37°C, washed with PBS for 5 min, permeabilized with 0.05% Triton-X in  
516 dH<sub>2</sub>O for 5 min, washed with PBS for 5 min and blocked for 2 h at room temperature or  
517 overnight at 4°C in blocking solution (as above). Primary antibodies and secondary  
518 antibodies were applied in concentrations described above, with primary antibodies  
519 diluted in blocking solution and secondary antibody diluted in PBS-NaN<sub>3</sub>. Each antibody

520 incubation was followed by three 5 min washes with PBS-NaN<sub>3</sub>. Coverslips were  
521 mounted on the glass cover slides using the ProLong® Gold antifade mountant with  
522 DAPI (Fisher Scientific).

### 523 **Inhibitors and drugs**

524 Stock solutions of all drugs and inhibitors were diluted in DMSO (Sigma-Aldrich) and  
525 stored @-20°C. The final concentration of the drugs were the following: Latrunculin B  
526 (Cayman Chemicals) 1 μM, Nocodazole (Sigma-Aldrich) 10 μM, Forchlorfenuron  
527 (Sigma-Aldrich) 100 μM.

### 528 **Cellular morphology and colocalization assessments**

529 Cell morphology was assessed using ImageJ (Sidhu, Beyene, & Rosenblum, 2006) or  
530 Volocity (Improvision/PerkinElmer) software packages. The number of extensions,  
531 extension dynamics, and extension length were scored or measured manually using the  
532 MTrackJ (Meijering, Dzyubachyk, & Smal, 2012) and KymoResliceWide version 0.4  
533 (Katrukha, 2014). The organization of microtubules in extensions was assessed using an  
534 evaluation rubric: wavy extensions were classified as those in which over 50% of  
535 microtubules had bends of 20-30 degrees; curled extensions were defined as those in  
536 which over 30% of microtubules had kinks or bends of 45 degrees or more; disorganized  
537 extensions were those with curled microtubules as well as microtubules deviating more  
538 than 20 degrees from the main body of the extension (splayed microtubules). Chains were  
539 assessed manually as extensions showing the presence of two cell bodies, either in the  
540 form of visible nuclei or characteristic cell shape.

541

## 542 **siRNA-mediated knockdown**

543 For siRNA knockdown, a custom IDT Oligos DsiRNA duplex for canine SEPT2 mRNA  
544 transcript variant X1 (NCBI Nucleotide accession number XM\_005635975.1) was  
545 designed, with the sequence 3' – UCACUAGCACCCAGGCACAUGCUGGCU – 3', 3'  
546 – AGUGAUCGUGGGUCCGUGUACGACC – 5' (Integrated DNA Technology,  
547 Coralville, IA). One-eighth of the standard spheroid preparation (250,000 cells grown  
548 over 5 days) was briefly spun down, resuspended in fresh media and spun down again.  
549 The cells were then mixed with 100uL of SE Cell Line 4D-Nucleofector® X Kit (Lonza,  
550 Basel, Switzerland) and transfected with 65nM siRNA diluted in MilliQ sterile-filtered  
551 water using the 4D-Nucleofector (Lonza, Basel, Switzerland) using the CA-152 protocol.  
552 The spheroids were transferred to a 35-mm dish of fresh warm media and left for four  
553 hours to recover post-transfection. The spheroids were then collected, briefly spun down  
554 and seeded to collagen gels as described previously. The spheroids were grown in the gel  
555 for 48 hours, then induced for morphogenesis with HGF for 24 hours and fixed.

## 556 **Statistical analysis**

557 For statistical analysis, Microsoft Excel with the StatPlus resource pack (Release 6.1.7.0,  
558 AnalystSoft Inc.) was used. For continuous data we used a two-tailed Student's t-test, and  
559 for categorical data we used contingency tables and Fisher's exact test. P-values of 0.05  
560 or lower were considered significant. For each experiment, the data were collected from  
561 at least three independent trials unless otherwise noted. Two-tailed Student's t-test was  
562 used for continuous data analysis and two-tailed Fisher's exact test was used to analyze  
563 the categorical data organized into contingency tables.

## 564 **Acknowledgements**

565 The authors would like to thank Joseph Wiegartner for his contributions to the initial stages of

566 this project, and Gerri Quinones, Brigitte Arduini and Sergey Pryshchep for technical assistance.

567 This work was funded by National Institutes of Health grant R01GM098619.

568

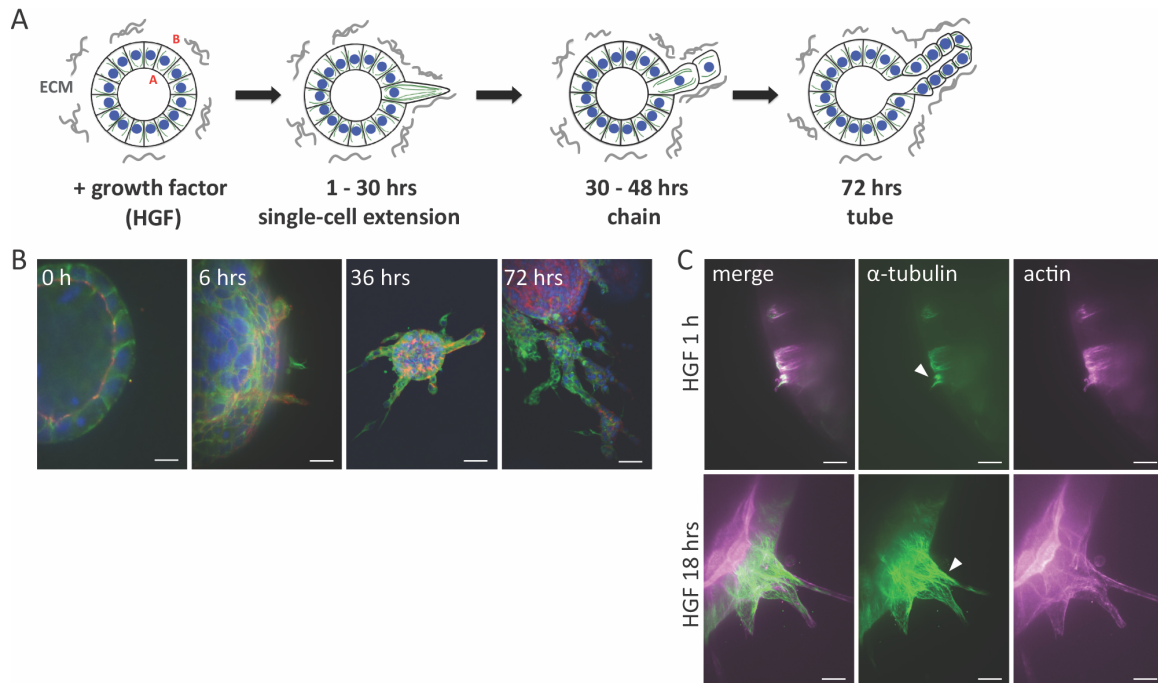

569

570 **Figure 1. In response to HGF, MDCK cells in 3D extend cytoplasmic extensions, which**  
571 **contain microtubules and actin.**

572 A. Schematic of spheroids of polarized epithelial cells which undergo morphogenesis in response  
573 to exposure to hepatocyte growth factor (HGF). Letters A and B correspond to, respectively,  
574 apical and basal domains of the cells. B. MDCK spheroids exposed to HGF display cytoplasmic  
575 extensions (6 hrs), which develop into chains (36 hrs), and eventually tubes (72 hrs).  $\alpha$  tubulin  
576 (green), zo-1 (red), F-actin (magenta), DAPI (blue). Scale = 20  $\mu$ m (0 hrs), 10  $\mu$ m (6 hrs), 40  $\mu$ m  
577 (36 and 72 hrs). C. Extensions have both microtubules (green) and actin filaments (magenta).  
578 Scale = 20  $\mu$ m. Arrowheads highlight microtubule bundles.

579

580

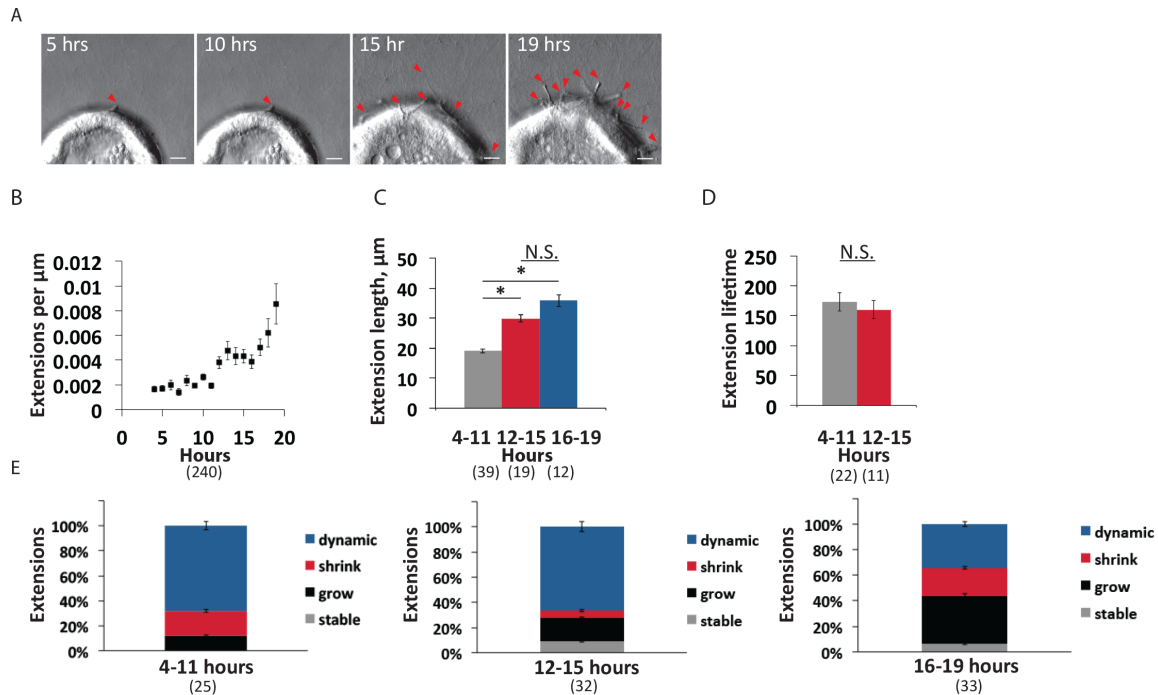

581

582 **Figure 2. Cytoplasmic extensions are dynamic.**

583 A. Timelapse images (DIC) of spheroids (4-19 hrs after addition of HGF). Arrowheads highlight  
 584 extensions. Scale = 10  $\mu\text{m}$ . B. Total number of extensions per  $\mu\text{m}$  of spheroid circumference  
 585 calculated hourly. Data represent >240 data points from 5 spheroids. Data points are mean  
 586 extensions per  $\mu\text{m}$  of spheroid circumference at each timepoint and error bars are SEM. C.  
 587 Average length of extensions during HGF treatment. Data collected from 70 extensions from 5  
 588 spheroids. Data points are means and error bars are SEM. Statistical analysis done with two-tailed  
 589 t-test,  $p \leq 0.05$  considered significant. D. Average extension lifetime (minutes) during phase 1  
 590 (formed after 4-11 hrs HGF) and phase 2 (formed after 12-15 hrs HGF). Data collected from 33  
 591 extensions from 5 spheroids, error bars are SEM. Statistical analysis done with two-tailed t-test,  $p$   
 592  $\leq 0.05$  considered significant. E. Extension dynamics during phase 1 (4-11 hrs of HGF  
 593 incubation), phase 2 (12-15 hrs of HGF incubation), and phase 3 (16-19 hrs of HGF incubation).  
 594 Data collected from >25 extensions from 5 spheroids. Data points are means and error bars are  
 595 SEM between spheroids. Statistical analysis done using a two-tailed Fisher's test,  $p \leq 0.05$   
 596 considered significant.  
 597



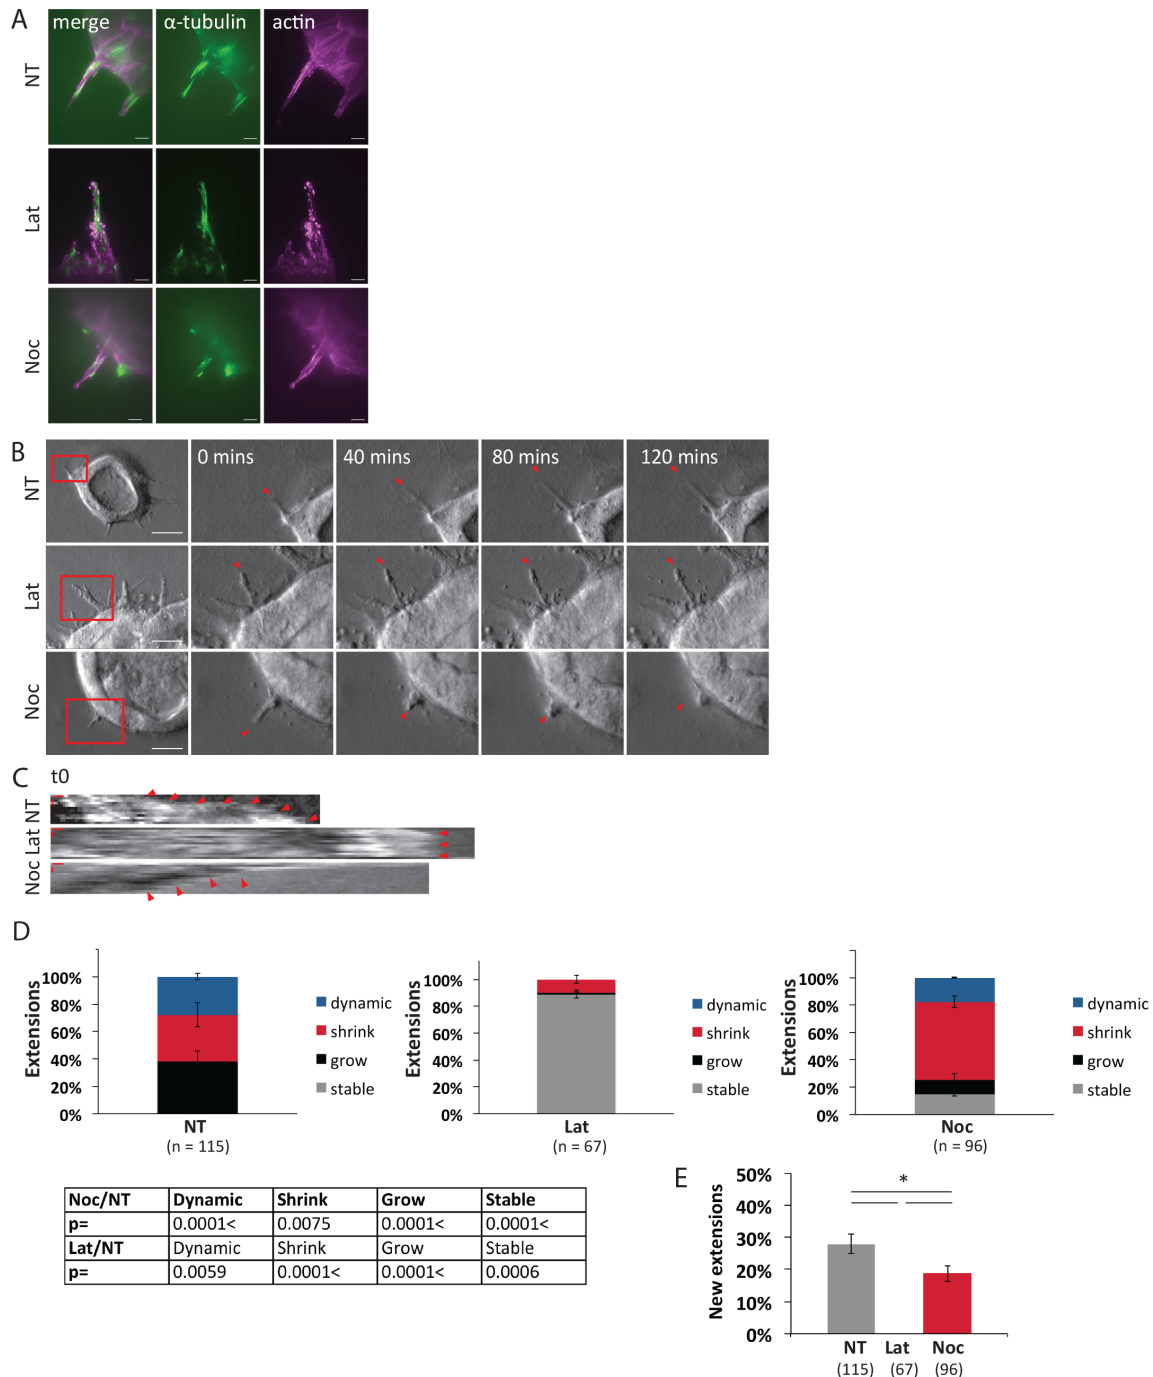

598  
599

**Figure 3. Extension growth and dynamics depend on both actin and microtubules.**

600 A. Treatment of cells with Latrunculin B or Nocodazole results in disruption of actin and  
601 microtubule cytoskeleton, respectively. Spheroids (18 hrs after addition of HGF) were treated  
602 with 1  $\mu$ M Latrunculin B, 10  $\mu$ M Nocodazole, or vehicle control for 2 hrs, the labeled for  
603 microtubules (anti-alpha-tubulin, green) or actin (phalloidin, magenta). B. Timelapse images  
604 (DIC) of spheroids (18 hrs after addition of HGF), with addition of 1  $\mu$ M Latrunculin B, 10  $\mu$ M  
605 Nocodazole, or vehicle control. Scale = 20  $\mu$ m. Arrowheads highlight tips of extensions. C.  
606 Kymographs of extensions after incubation with HGF for 18 hrs, and addition of either 1  $\mu$ M

607 Latrunculin B, 10  $\mu$ M Nocodazole, or vehicle control at  $t = 0$ . Horizontal scale = 1  $\mu$ m, vertical  
608 scale = 20 mins. Arrowheads indicate growing extension in control (NT), stalled extension in  
609 Latrunculin B (Lat), and shrinking extension in Nocodazole (Noc). D. Extension dynamics (after  
610 incubation with HGF for 18 hrs) during 2 hr recording window after addition of either 1  $\mu$ M  
611 Latrunculin B, 10  $\mu$ M Nocodazole, or vehicle control. Data collected from > 67 extensions per  
612 condition, >10 spheroids per condition, in three independent experiments. Data points are means  
613 of proportions of extensions showing the specified behavior and error bars are SEM. Statistical  
614 analysis done using a two-tailed Fisher's test, p values  $\leq 0.05$  considered significant. E. Percent  
615 of all extensions observed in 2 hr recording window that are newly emerged. Data collected from  
616 > 67 extensions per condition, > 10 spheroids per condition, in three independent experiments.  
617 Data points are means of shares of newly emerged extensions and error bars are SEM. Statistical  
618 analysis done using a two-tailed Fisher's test, p values  $\leq 0.05$  considered significant.

619

620

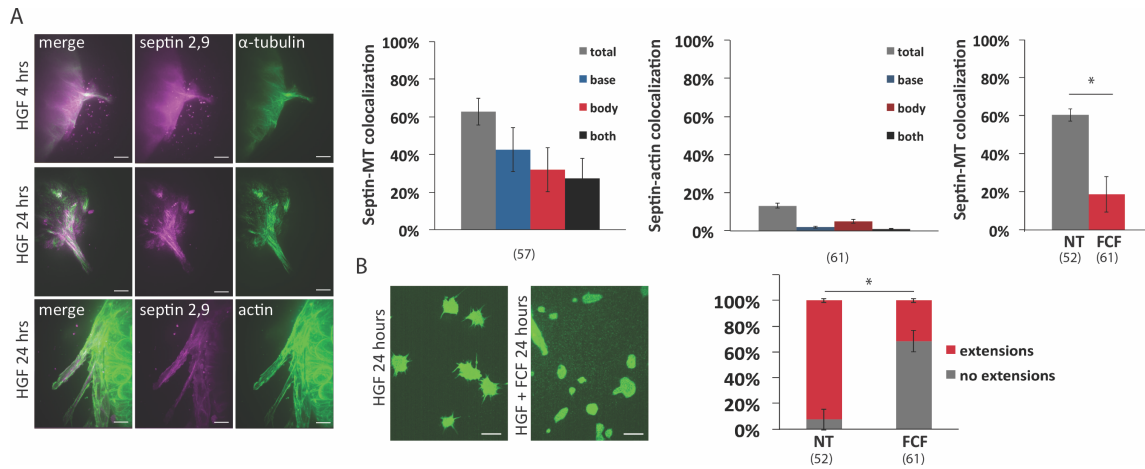

621

622 **Figure 4. Septins colocalize with microtubules in extensions and are necessary for extension**  
 623 **formation.**

624 A. Septins colocalize with microtubules, but not actin in extensions. Images:  $\alpha$ -tubulin or F-actin  
 625 (green), septins 2+9 (antibody cocktail) (magenta), scale = 10  $\mu$ m. Septin-microtubule  
 626 colocalization analysis of 24 hour of HGF dataset, from >50 extensions from >15 spheroids in 2  
 627 independent experiments. Data points are means, error bars are SEM. Scale = 10  $\mu$ m. Septin  
 628 disruption with 100  $\mu$ M Forchlorfenuron (FCF) results in decrease in septin-microtubule  
 629 colocalization. Data collected from >100 extensions in two independent experiments. Data  
 630 points are means, error bars are SEM. Statistical analysis done using two-tailed Fisher's test,  $p \leq$   
 631 0.05 considered significant. B. Septin disruption with 100  $\mu$ M FCF inhibits extension formation.  
 632 Spheroids were incubated with HGF and FCF together for 24 hrs. Cells labeled with  $\alpha$ -tubulin  
 633 (green), scale = 50  $\mu$ m. Data collected from > 52 spheroids in two independent experiments. Data  
 634 points are means, error bars are SEM between spheroids. Statistical analysis done using two-  
 635 tailed Fisher's test,  $p$  values  $\leq$  0.05 considered significant.

636

637

638

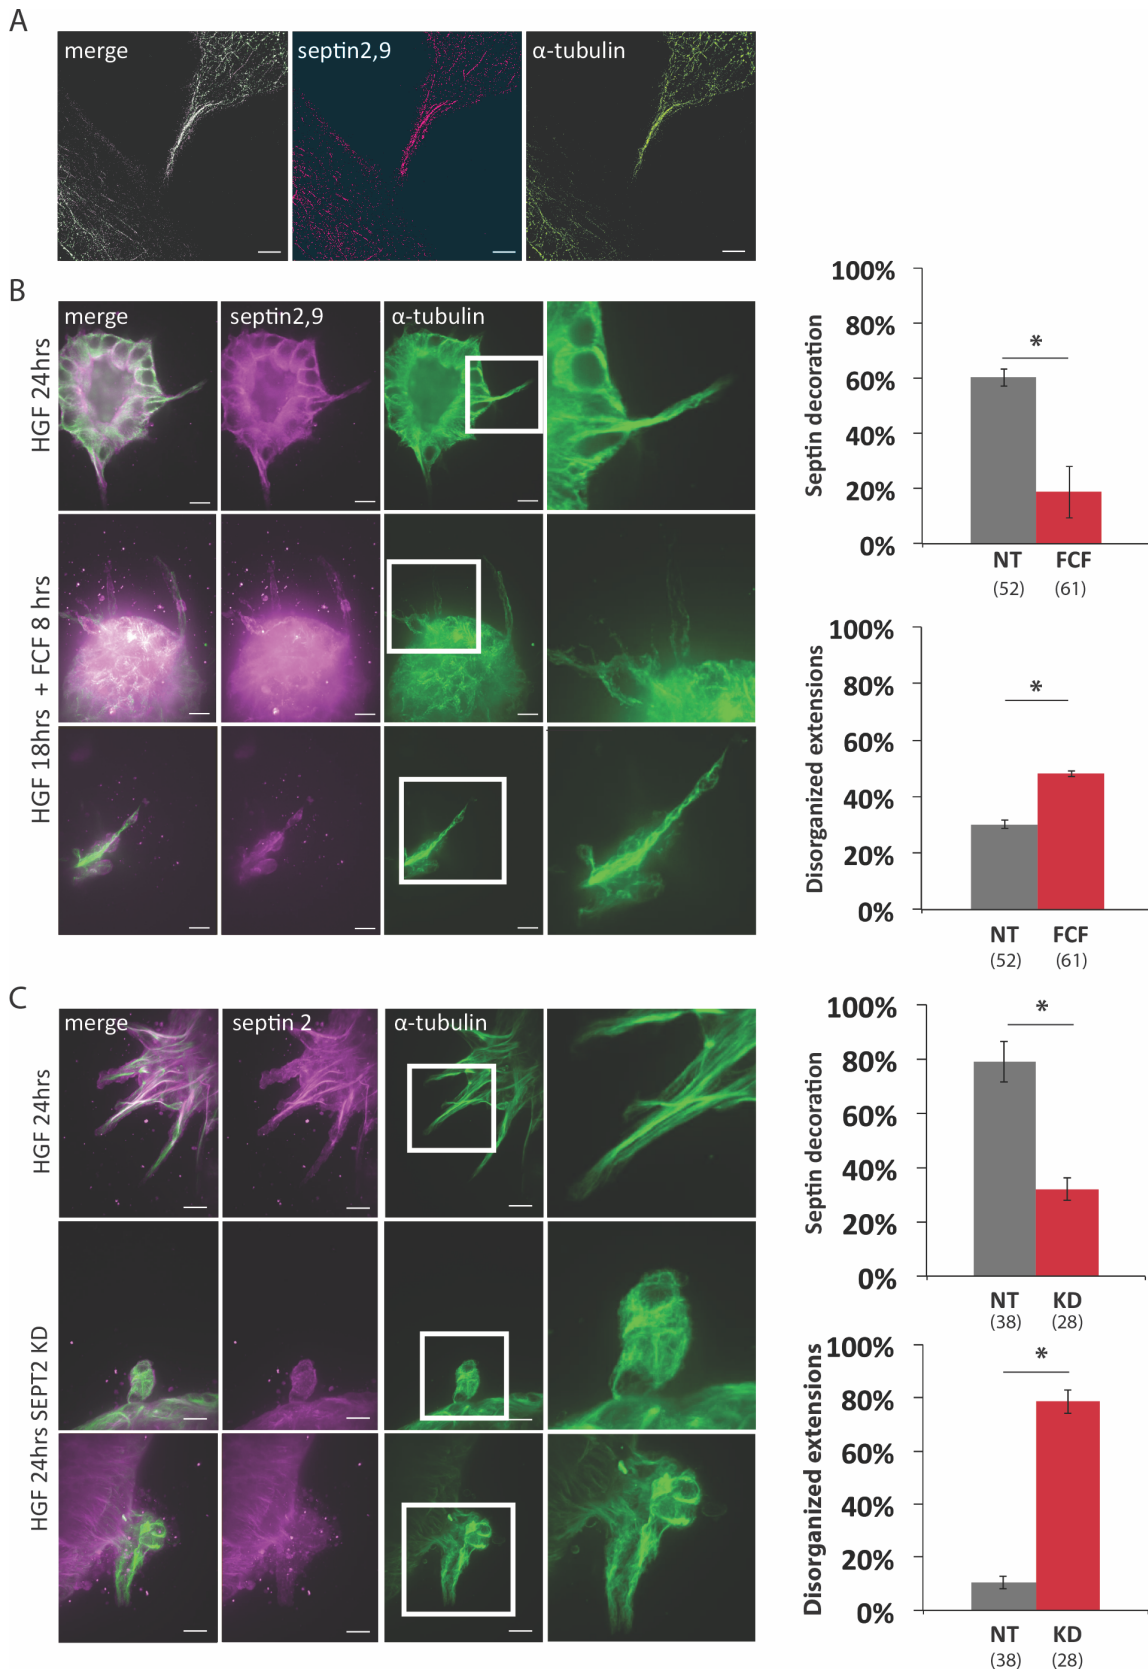

639

640 **Figure 5. Septins localize to microtubule bundles and are necessary for the maintenance of**  
641 **microtubule organization in extensions.**

642 A. Super-resolution (STORM) images showing localization of septins to microtubule bundles.  
643 Images:  $\alpha$ -tubulin (green), septins 2+9 (antibody cocktail) (magenta), scale = 5  $\mu$ m. B. Disruption  
644 of septin network with FCF leads to disorganized microtubules in extensions. In extensions in  
645 control spheroids incubated with HGF for 24 hours, microtubules are predominantly straight and  
646 bundled (top row). In extensions in spheroids treated with HGF for 24 hours + FCF for the last 8  
647 hours, microtubules are often disorganized, either unbundled and splayed (middle row), or with  
648 wavy or curly bundles (bottom row).  $\alpha$ -tubulin (green), septins 2+9 (antibody cocktail) (magenta),  
649 scale = 10  $\mu$ m. Quantification of the number of disorganized extensions (defined as those with  
650 curled, wavy or splayed microtubules) in control vs FCF treated spheroids. Data collected from >  
651 50 extensions in two independent experiments, error bars are SEM. Statistical analysis done using  
652 two-tailed t-test,  $p \leq 0.05$  considered significant. C. Knockdown of septin 2 results in  
653 disorganized microtubules and misshapen extensions. In control spheroids, extensions are straight  
654 and elongated, with microtubules that are predominantly straight and bundled and exhibit robust  
655 septin decoration (top row), while in KD spheroids, extensions are rounded or irregularly shaped,  
656 with unbundled and splayed microtubules, and no septin decoration (bottom row).  $\alpha$ -tubulin  
657 (green), septins 2+9 (antibody cocktail) (magenta), scale = 10  $\mu$ m. Quantification of septin  
658 decoration of microtubule bundles, and number of extensions with disorganized microtubules  
659 (defined as those with curled, wavy or splayed microtubules) in control vs SEPT2 KD spheroids.  
660 Data collected from > 28 extensions in three independent experiments, error bars are SEM.  
661 Statistical analysis done using two-tailed Fisher's test,  $p$  values  $\leq 0.05$  considered significant.

662

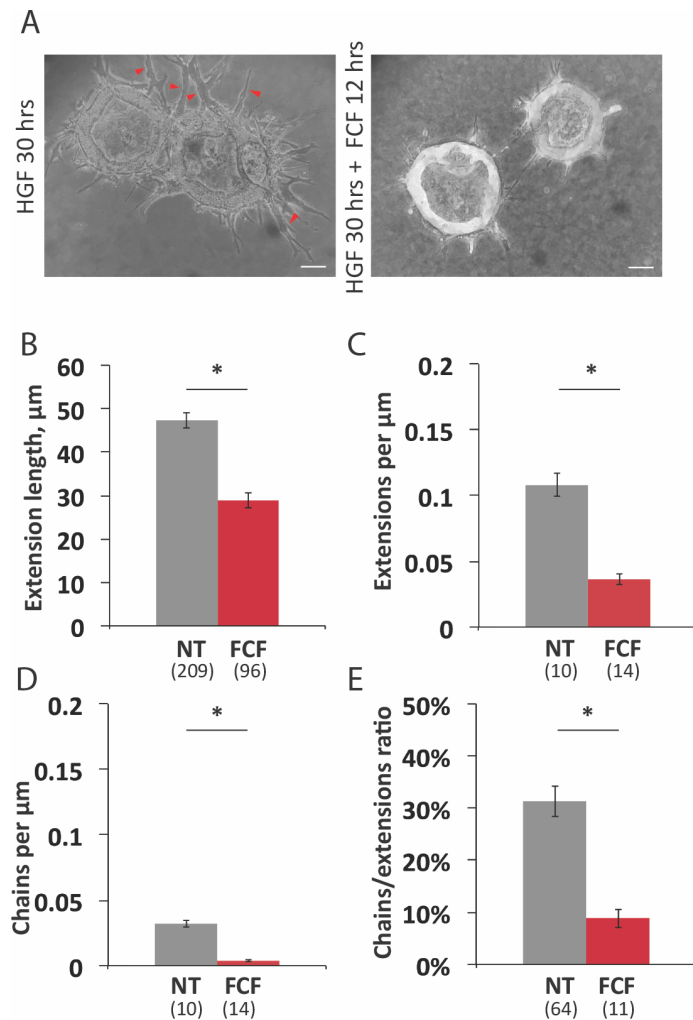

663

664 **Figure 6. Disruption of septin network with FCF interferes with transition from single cell**  
665 **extensions to multicellular chains.**

666 A. Spheroids were treated with HGF for 18 hrs to allow extensions to form and then treated with  
667 HGF plus 100  $\mu\text{M}$  FCF or vehicle control for an additional 12 hrs. Arrowheads indicate chains  
668 (defined as extensions containing two or more cells). Scale = 40  $\mu\text{m}$ . B. Quantification of  
669 extension/chain length after 30 hrs HGF incubation (+/- FCF for the last 12 hrs). Data collected  
670 from >10 spheroids, > 90 extensions. Data points are means, error bars are SEM between  
671 spheroids. Statistical analysis done using two-tailed t-test,  $p \leq 0.05$  considered significant. C.  
672 Quantification of average number of extensions per  $\mu\text{m}$  of spheroid circumference after 30 hrs  
673 HGF incubation (+/- FCF for the last 12 hrs). Quantification of extension/chain length after 30  
674 hrs HGF incubation (+/- FCF for the last 12 hrs). Data collected from  $\geq 10$  spheroids,  $\geq 90$   
675 extensions. Data points are means, error bars are SEM between spheroids. Statistical analysis  
676 done using two-tailed t-test,  $p \leq 0.05$  considered significant. D. Quantification of average number  
677 of multicellular chains per  $\mu\text{m}$  of spheroid circumference after 30 hrs HGF incubation (+/- FCF  
678 for the last 12 hrs). Averages from  $\geq 10$  spheroids,  $\geq 90$  extensions, error bars represent SEM  
679 between spheroids. Statistical analysis done using two-tailed t-test,  $p \leq 0.05$  considered

680 significant. E. Quantification of ratio of multicellular chains to extensions after 30 hrs HGF  
681 incubation (+/- FCF for the last 12 hrs). Averages from  $\geq 10$  spheroids,  $\geq 90$  extensions, error bars  
682 represent SEM between spheroids. Statistical analysis done using two-tailed t-test,  $p \leq 0.05$   
683 considered significant.

684

685

686

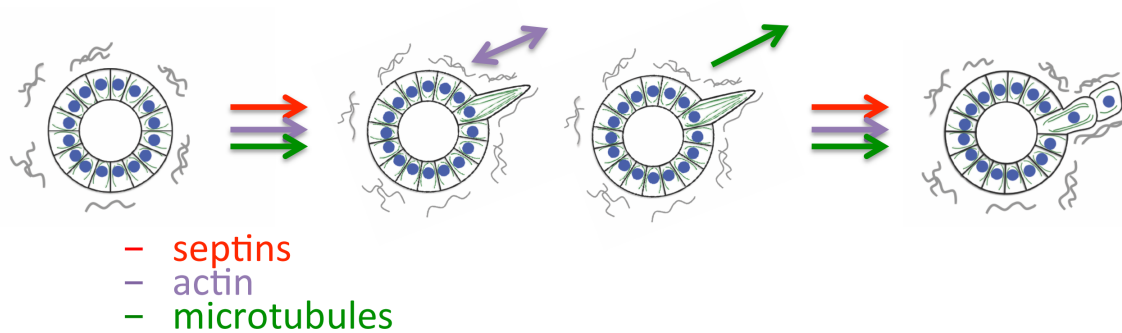

687

688 **Figure 7. Septins, actin, and microtubules each play distinct, but coordinated, roles in early**  
689 **stage of cellular morphogenesis.**

690 A. Model showing coordinated involvement of septins, actin and microtubules in extension  
691 formation and dynamics. All three cytoskeletal systems are necessary for the formation of  
692 the extensions. In newly formed extensions, actin is primarily responsible for the dynamic  
693 behavior, while microtubules are necessary for the persistent growth of the extensions. And  
694 all three systems also work together for the formation of chains and continuation of  
695 morphogenesis.

696

697



698

## 699 **References**

- 700 Addi, C., Bai, J., & Echard, A. (2018). Actin, microtubule, septin and ESCRT filament  
701 remodeling during late steps of cytokinesis. *Current Opinion in Cell Biology*, *50*, 27–34.  
702 <http://doi.org/10.1016/J.CEB.2018.01.007>
- 703 Ageta-Ishihara, N., Miyata, T., Ohshima, C., Watanabe, M., Sato, Y., Hamamura, Y., ...  
704 Kinoshita, M. (2013). Septins promote dendrite and axon development by negatively regulating  
705 microtubule stability via HDAC6-mediated deacetylation. *Nature Communications*, *(4)*, 2532.  
706 <http://doi.org/10.1038/ncomms3532>
- 707 Bai, X., Bowen, J. R., Knox, T. K., Zhou, K., Pendziwiat, M., Kuhlenbäumer, G., ... Spiliotis, E.  
708 T. (2013). Novel septin 9 repeat motifs altered in neuralgic amyotrophy bind and bundle  
709 microtubules. *The Journal of Cell Biology*, *203*(6), 895–905.  
710 <http://doi.org/10.1083/jcb.201308068>
- 711 Bando, T., Mito, T., Nakamura, T., Ohuchi, H., & Noji, S. (2011). Regulation of leg size and  
712 shape: Involvement of the Dachshous-fat signaling pathway. *Dev Dyn*, *240*(5), 1028–1041.  
713 <http://doi.org/10.1002/dvdy.22590>
- 714 Bogorodskaya, D., McLane, J., & Ligon, L. (2018). Manuscript preparation.
- 715 Bordeleau, F., Alcoser, T. A., & Reinhart-King, C. A. (2014). Physical biology in cancer. 5. The  
716 rocky road of metastasis: the role of cytoskeletal mechanics in cell migratory response to 3D  
717 matrix topography. *American Journal of Physiology. Cell Physiology*, *306*(2), C110–C120.  
718 <http://doi.org/10.1152/ajpcell.00283.2013>
- 719 Boubakar, L., Falk, J., Ducuing, H., Thoinet, K., Reynaud, F., Derrington, E., & Castellani, V.

- 720 (2017). Molecular memory of morphologies by septins during neuron generation allows early  
721 polarity inheritance. *Neuron*, 95(4), 834–851.e5. <http://doi.org/10.1016/J.NEURON.2017.07.027>
- 722 Bowen, J. R., Hwang, D., Bai, X., Roy, D., & Spiliotis, E. T. (2011). Septin GTPases spatially  
723 guide microtubule organization and plus end dynamics in polarizing epithelia. *The Journal of Cell*  
724 *Biology*, 194(2), 187–97. <http://doi.org/10.1083/jcb.201102076>
- 725 Devarajan, P. (2004). Has HGF met other partners? Met-independent epithelial morphogenesis  
726 induced by HGF. Focus on “Hepatocyte growth factor induces MDCK cell morphogenesis  
727 without causing loss of tight junction functional integrity.” *American Journal of Physiology. Cell*  
728 *Physiology*, 286(3), C475-7. <http://doi.org/10.1152/ajpcell.00517.2003>
- 729 Dolat, L., Hunyara, J. L., Bowen, J. R., Karasmanis, E. P., Elgawly, M., Galkin, V. E., &  
730 Spiliotis, E. T. (2014). Septins promote stress fiber-mediated maturation of focal adhesions and  
731 renal epithelial motility. *The Journal of Cell Biology*, 207(2), 225–235.  
732 <http://doi.org/10.1083/jcb.201405050>
- 733 Dotti, C. G., Sullivan, C. A., & Banker, G. A. (1988). The establishment of polarity by  
734 hippocampal neurons in culture. *The Journal of Neuroscience : The Official Journal of the*  
735 *Society for Neuroscience*, 8(4), 1454–68. <http://doi.org/10.1523/JNEUROSCI.08-04-01454.1988>
- 736 Estey, M. P., Di Ciano-Oliveira, C., Froese, C. D., Bejide, M. T., & Trimble, W. S. (2010).  
737 Distinct roles of septins in cytokinesis: SEPT9 mediates midbody abscission. *The Journal of Cell*  
738 *Biology*, 191(4), 741–9. <http://doi.org/10.1083/jcb.201006031>
- 739 Fessenden, T. B., Beckham, Y., Perez-Neut, M., Ramirez-San Juan, G., Chourasia, A. H.,  
740 MacCleod, K. F., ... Gardel, M. L. (2018). Dia1-dependent adhesions are required by epithelial  
741 tissues to initiate invasion. *The Journal of Cell Biology*, 217(4), 1485.  
742 <http://doi.org/10.1083/jcb.201703145>

- 743 Forth, S., & Kapoor, T. M. (2017). The mechanics of microtubule networks in cell division. *The*  
744 *Journal of Cell Biology*, 216(6), 1525–1531. <http://doi.org/10.1083/jcb.201612064>
- 745 Froidevaux-Klipfel, L., Targa, B., Cantaloube, I., Ahmed-Zaid, H., Poüs, C., & Baillet, A. (2015).  
746 Septin cooperation with tubulin polyglutamylolation contributes to cancer cell adaptation to  
747 taxanes. *Oncotarget*, 6(34), 36063–80. <http://doi.org/10.18632/oncotarget.5373>
- 748 Gierke, S., & Wittmann, T. (2012). EB1-recruited microtubule +TIP complexes coordinate  
749 protrusion dynamics during 3D epithelial remodeling. *Current Biology : CB*, 22(9), 753–62.  
750 <http://doi.org/10.1016/j.cub.2012.02.069>
- 751 Hu, J., Bai, X., Bowen, J. R., Dolat, L., Korobova, F., Yu, W., ... Spiliotis, E. T. (2012). Septin-  
752 driven coordination of actin and microtubule remodeling regulates the collateral branching of  
753 axons. *Current Biology : CB*, 22(12), 1109–15. <http://doi.org/10.1016/j.cub.2012.04.019>
- 754 Ingber, D. E., Wang, N., & Stamenović, D. (2014). Tensegrity, cellular biophysics, and the  
755 mechanics of living systems. *Reports on Progress in Physics*, 77(4), 46603.  
756 <http://doi.org/10.1088/0034-4885/77/4/046603>
- 757 Katrukha, E. (2014). Why another kymograph ImageJ plugin? Retrieved from  
758 <http://katpyxa.info/feedbacks/?p=26>
- 759 Kim, H. Y., & Nelson, C. M. (2012). Extracellular matrix and cytoskeletal dynamics during  
760 branching morphogenesis. *Organogenesis*, 8(2), 56–64. <http://doi.org/10.4161/org.19813>
- 761 Martínez, C., Corral, J., Dent, J. A., Sesma, L., Vicente, V., & Ware, J. (2006). Platelet septin  
762 complexes form rings and associate with the microtubular network. *Journal of Thrombosis and*  
763 *Haemostasis*, 4(6), 1388–1395. <http://doi.org/10.1111/j.1538-7836.2006.01952.x>
- 764 McLane, J. S., & Ligon, L. A. (2015). Palladin mediates stiffness induced fibroblast activation in

- 765 the tumor microenvironment. *Biophysical Journal*, *109*(2), 249–264.  
766 <http://doi.org/10.1016/j.bpj.2015.06.033>
- 767 McLane, J. S., & Ligon, L. A. (2016). Stiffened extracellular matrix and signaling from stromal  
768 fibroblasts via osteoprotegerin combine to result in regulation of tumor cell invasiveness in a 3-D  
769 model of a tumor in situ. *Cancer Microenvironment*, *9*(2–3), 127–139.  
770 <http://doi.org/10.1007/s12307-016-0188-z>
- 771 McLane, J. S., Rivet, C. J., Gilbert, R. J., & Ligon, L. A. (2014). A biomaterial model of tumor  
772 stromal microenvironment promotes mesenchymal morphology but not epithelial to  
773 mesenchymal transition in epithelial cells. *Acta Biomaterialia*, *10*(11), 4811–4821.  
774 <http://doi.org/10.1016/j.actbio.2014.07.016>
- 775 Meijering, E., Dzyubachyk, O., & Smal, I. (2012). Methods for cell and particle tracking.  
776 *Methods in Enzymology*, *504*, 183–200. <http://doi.org/10.1016/B978-0-12-391857-4.00009-4>
- 777 Menon, M. B., Sawada, A., Chaturvedi, A., Mishra, P., Schuster-Gossler, K., Galla, M., ...  
778 Gaestel, M. (2014). Genetic deletion of SEPT7 reveals a cell type-specific role of septins in  
779 microtubule destabilization for the completion of cytokinesis. *PLoS Genetics*, *10*(8), e1004558.  
780 <http://doi.org/10.1371/journal.pgen.1004558>
- 781 Morimoto, A., Oh, Y., Nakamura, S., Shioda, Y., Hayase, T., Imamura, T., ... Japan Langerhans  
782 cell histiocytosis Study Group. (2017). Inflammatory serum cytokines and chemokines increase  
783 associated with the disease extent in pediatric Langerhans cell histiocytosis. *Cytokine*, *97*, 73–79.  
784 <http://doi.org/10.1016/j.cyto.2017.05.026>
- 785 Mostowy, S., & Cossart, P. (2012). Septins: the fourth component of the cytoskeleton. *Nat Rev*  
786 *Mol Cell Biol*, *13*(3), 183–194. <http://doi.org/10.1038/nrm3284>

- 787 Nagata, K. ichi, Kawajiri, A., Matsui, S., Takagishi, M., Shiromizu, T., Saitoh, N., ... Inagaki, M.  
788 (2003). Filament formation of MSF-A, a mammalian septin, in human mammary epithelial cells  
789 depends on interactions with microtubules. *Journal of Biological Chemistry*, 278(20), 18538–  
790 18543. <http://doi.org/10.1074/jbc.M205246200>
- 791 Nakamura, T., Sakai, K., Nakamura, T., & Matsumoto, K. (2011). Hepatocyte growth factor  
792 twenty years on: Much more than a growth factor. *Journal of Gastroenterology and Hepatology*,  
793 26 Suppl 1(Table 1), 188–202. <http://doi.org/10.1111/j.1440-1746.2010.06549.x>
- 794 Nölke, T., Schwan, C., Lehmann, F., Østevold, K., Pertz, O., & Aktories, K. (2016). Septins  
795 guide microtubule protrusions induced by actin-depolymerizing toxins like Clostridium difficile  
796 transferase (CDT). *Proceedings of the National Academy of Sciences of the United States of*  
797 *America*, 113(28), 7870–5. <http://doi.org/10.1073/pnas.1522717113>
- 798 O'Brien, L. E., Tang, K., Kats, E. S., Schutz-Geschwender, A., Lipschutz, J. H., & Mostov, K. E.  
799 (2004). ERK and MMPs sequentially regulate distinct stages of epithelial tubule development.  
800 *Developmental Cell*, 7(1), 21–32. <http://doi.org/10.1016/j.devcel.2004.06.001>
- 801 Østevold, K., Meléndez, A. V., Lehmann, F., Schmidt, G., Aktories, K., & Schwan, C. (2017).  
802 Septin remodeling is essential for the formation of cell membrane protrusions (microtentacles) in  
803 detached tumor cells. *Oncotarget*, 8(44), 76686–76698. <http://doi.org/10.18632/oncotarget.20805>
- 804 Pacheco, A., & Gallo, G. (2016). Actin filament-microtubule interactions in axon initiation and  
805 branching. *Brain Research Bulletin*, 126(Pt 3), 300–310.  
806 <http://doi.org/10.1016/j.brainresbull.2016.07.013>
- 807 Pollack, A. L., Runyan, R. B., & Mostov, K. E. (1998). Morphogenetic mechanisms of epithelial  
808 tubulogenesis: MDCK cell polarity is transiently rearranged without loss of cell-cell contact  
809 during scatter factor/hepatocyte growth factor-induced tubulogenesis. *Developmental Biology*,

- 810 204(1), 64–79. <http://doi.org/10.1006/dbio.1998.9091>
- 811 Rosário, M., & Birchmeier, W. (2003). How to make tubes: signaling by the Met receptor  
812 tyrosine kinase. *Trends in Cell Biology*, 13(6), 328–35. <http://doi.org/10.1016/S0962->  
813 8924(03)00104-1
- 814 Scagliotti, G. V., Novello, S., & von Pawel, J. (2013). The emerging role of MET/HGF inhibitors  
815 in oncology. *Cancer Treatment Reviews*, 39(7), 793–801.  
816 <http://doi.org/10.1016/j.ctrv.2013.02.001>
- 817 Schwan, C., & Aktories, K. (2016). Formation of nanotube-like protrusions, regulation of septin  
818 organization and re-guidance of vesicle traffic by depolymerization of the actin cytoskeleton  
819 induced by binary bacterial protein toxins. *Current Topics in Microbiology and Immunology*, 399,  
820 35–51. [http://doi.org/10.1007/82\\_2016\\_25](http://doi.org/10.1007/82_2016_25)
- 821 Sellin, M. E., Holmfeldt, P., Stenmark, S., & Gullberg, M. (2011). Microtubules support a disk-  
822 like septin arrangement at the plasma membrane of mammalian cells. *Molecular Biology of the*  
823 *Cell*, 22(23), 4588–601. <http://doi.org/10.1091/mbc.E11-09-0754>
- 824 Sellin, M. E., Sandblad, L., Stenmark, S., & Gullberg, M. (2011). Deciphering the rules  
825 governing assembly order of mammalian septin complexes. *Molecular Biology of the Cell*,  
826 22(17), 3152–64. <http://doi.org/10.1091/mbc.E11-03-0253>
- 827 Sidhu, G., Beyene, J., & Rosenblum, N. D. (2006, July). Outcome of isolated antenatal  
828 hydronephrosis: A systematic review and meta-analysis. *Pediatric Nephrology*.  
829 <http://doi.org/10.1007/s00467-005-2100-9>
- 830 Spiliotis, E. T. (2018). Spatial effects - site-specific regulation of actin and microtubule  
831 organization by septin GTPases. *Journal of Cell Science*, 131(1), jcs207555.

- 832 <http://doi.org/10.1242/jcs.207555>
- 833 Spiliotis, E. T., Hunt, S. J., Hu, Q., Kinoshita, M., & Nelson, W. J. (2008). Epithelial polarity  
834 requires septin coupling of vesicle transport to polyglutamylated microtubules. *Journal of Cell*  
835 *Biology*, 180(2), 295–303. <http://doi.org/10.1083/jcb.200710039>
- 836 Steffan, J. J., Coleman, D. T., & Cardelli, J. a. (2011). The HGF-met signaling axis: emerging  
837 themes and targets of inhibition. *Current Protein & Peptide Science*, 12(1), 12–22.  
838 <http://doi.org/10.2174/138920311795659425>
- 839 Surka, M. C., Tsang, C. W., & Trimble, W. S. (2002). The mammalian septin MSF localizes with  
840 microtubules and is required for completion of cytokinesis. *Molecular Biology of the Cell*, 13(10),  
841 3532–45. <http://doi.org/10.1091/mbc.E02-01-0042>
- 842 Tokunou, M., Niki, T., Eguchi, K., Iba, S., Tsuda, H., Yamada, T., ... Hirohashi, S. (2001). c-  
843 MET Expression in Myofibroblasts. *The American Journal of Pathology*, 158(4), 1451–1463.  
844 [http://doi.org/10.1016/S0002-9440\(10\)64096-5](http://doi.org/10.1016/S0002-9440(10)64096-5)
- 845 Winans, A. M., Collins, S. R., & Meyer, T. (2016). Waves of actin and microtubule  
846 polymerization drive microtubule-based transport and neurite growth before single axon  
847 formation. *eLife*, 5, e12387. <http://doi.org/10.7554/eLife.12387>
- 848 Xiao, G.-H., Jeffers, M., Bellacosa, A., Mitsuuchi, Y., Vande Woude, G. F., & Testa, J. R.  
849 (2001). Anti-apoptotic signaling by hepatocyte growth factor/Met via the phosphatidylinositol 3-  
850 kinase/Akt and mitogen-activated protein kinase pathways. *Proceedings of the National Academy*  
851 *of Sciences*, 98(1), 247–252. <http://doi.org/10.1073/pnas.98.1.247>
- 852 Xie, Y., Vessey, J. P., Konecna, A., Dahm, R., Macchi, P., & Kiebler, M. A. (2007). The GTP-  
853 binding protein Septin 7 is critical for dendrite branching and dendritic-spine morphology.

- 854 *Current Biology : CB*, 17(20), 1746–51. <http://doi.org/10.1016/j.cub.2007.08.042>
- 855 Yu, W., O'Brien, L. E., Wang, F., Bourne, H., Mostov, K. E., & Zegers, M. M. P. (2003).  
856 Hepatocyte growth factor switches orientation of polarity and mode of movement during  
857 morphogenesis of multicellular epithelial structures. *Molecular Biology of the Cell*, 14(2), 748–  
858 63. <http://doi.org/10.1091/mbc.E02-06-0350>
- 859 Yu, W., Shewan, A. M., Brakeman, P., Eastburn, D. J., Datta, A., Bryant, D. M., ... Mostov, K.  
860 E. (2008). Involvement of RhoA, ROCK I and myosin II in inverted orientation of epithelial  
861 polarity. *EMBO Rep*, 9(9), 923–929. <http://doi.org/10.1038/embor.2008.135>
- 862 Zhang, Y.-W., & Vande Woude, G. F. (2003). HGF/SF-met signaling in the control of branching  
863 morphogenesis and invasion. *Journal of Cellular Biochemistry*, 88(2), 408–17.  
864 <http://doi.org/10.1002/jcb.10358>
- 865
- 866
